# Supplementary material for: Dual active sites fabricated through atomic layer deposition of TiO2 on MoS2 nanosheet arrays for highly efficient electroreduction of CO2 to ethanol
Source: Royal Society of Chemistry journal article supplement (doi:10.1039/d0ta11457j), 2021-01-01
Supplement: d0ta11457j1.pdf [file d0ta11457j1.pdf]

## Supporting Information

### Dual active sites fabricated through atomic layer deposition of TiO<sub>2</sub> on MoS<sub>2</sub> nanosheet arrays for highly efficient electroreduction of CO<sub>2</sub> to ethanol

Feixuanyu Qi, ‡<sup>ac</sup> Kang Liu, ‡<sup>b</sup> De-Kun Ma, \*<sup>ac</sup> Fangfang Cai,<sup>c</sup> Min Liu,<sup>\*b</sup> Quanlong Xu,<sup>c</sup> Wei Chen,<sup>c</sup> Chenze Qi,<sup>a</sup> Dongpeng Yang<sup>d</sup> and Shaoming Huang \*<sup>d</sup>

#### Experimental Section:

##### 1.1 Materials and Chemicals

Ammonium tetrathiomolybdate (ATM, 99.95%), N, N-dimethylformamide (DMF, ≥99.9 %) and hydrazine monohydrate (N<sub>2</sub>H<sub>2</sub>·H<sub>2</sub>O, >98.0%), analytical reagents of KHCO<sub>3</sub>, acetone, and hydrochloric acid were purchased from Shanghai Aladdin Biochemical Technology Co. Ltd. Dimethylsulfoxide (DMSO) and ethanol (HPLC pure) were purchased from J&K chemicals. Mo mesh was purchased from Shengzhuo Stainless Steel Mesh Company. All chemicals were used without further purification. All the aqueous solutions were prepared with Milli Q water (18.2 MΩ cm). 1 × 4 cm<sup>2</sup> Mo mesh was washed with acetone, dilute hydrochloric acid, and high purity water before use.

##### 1.2.1 Synthesis of ultrathin MoS<sub>2</sub> nanosheet arrays on Mo mesh

In a typical process, 10 mg of ATM was dissolved into 30 mL of DMF under ultrasonification. A piece of clean 1 × 4 cm<sup>2</sup> Mo mesh was put in the solution. Then 50 μl of N<sub>2</sub>H<sub>4</sub>·H<sub>2</sub>O was added to

the solution and stirred for 15 minutes. After that, it was transferred to a Teflon-lined stainless-steel autoclave, kept at 200 °C for 15 h. After the temperature cooled to room temperature, the Mo mesh containing MoS<sub>2</sub> was washed with highly purified water and dried at 65 °C under vacuum.

#### 1.2. 2 Preparation of TiO<sub>2</sub>/MoS<sub>2</sub>

Different thickness of TiO<sub>2</sub> thin film was deposited upon the pre-prepared MoS<sub>2</sub>/Mo with ALD system. The Titanium isopropoxide (TTIP) was used as Ti precursor, H<sub>2</sub>O was used as an oxygen source. High-purity N<sub>2</sub> (99.999%) was used as the carrier gas with a flow of 100 sccm along the reactor. High-purity O<sub>2</sub> (99.999%) was used as the plasma gas with a flow of 300 sccm along the reactor. Each cycle of ALD deposits 0.4 Å of TiO<sub>2</sub>. 25, 50, and 75 cycles were applied to obtain TiO<sub>2</sub> with thicknesses of 1, 2, and 3 nm, respectively.

#### 1.3 Characterizations.

Powder X-ray diffraction (XRD) was carried out with a Bruker D8 Advance X-ray diffractometer using Cu K $\alpha$  radiation ( $\lambda = 0.15418$  nm) at a scanning rate of 7°/min in the  $2\theta$  range from 20° to 80°. Field emission scanning electron microscopy (FESEM) images were taken on a Nova NanoSEM 200 scanning electron microscope. Transmission electron microscopy (TEM) observations and high-resolution transmission electron microscope (HRTEM) images were performed with a JEOL JEM 2010 HRTEM, using an accelerating voltage of 200 kV. X-ray photoelectron spectra (XPS) were acquired on an ESCALAB 250 with Al K $\alpha$  ( $h\nu = 1253.6$  eV) as the excitation source. The binding energies obtained in the XPS spectral analysis were corrected for specimen charging by referencing C 1s to 284.8 eV. The gaseous products from CO<sub>2</sub> electrochemical reduction were analyzed by gas chromatography (Agilent 7890A). The liquid products were analyzed by <sup>1</sup>H NMR spectroscopy (Bruker, 500M), with water suppression using a presaturation method.

#### 1.4 Electrochemical measurements.

The electrocatalytic experiments were carried out through electrochemical workstation CHI760E in an H-type three-electrode electrochemical cell with 0.5 M KHCO<sub>3</sub> electrolyte saturated with Ar, CO<sub>2</sub>, or CO. The working electrode and the anode compartment were separated by a cation exchange membrane (Nafion N115, DuPont). MoS<sub>2</sub>/Mo and TiO<sub>2</sub>/MoS<sub>2</sub> were used as working electrode.

Platinum plate and Ag/AgCl (in saturated KCl solution) electrode were used as the counter electrode and the reference electrode, respectively. The area of the cathode immersed in the electrolyte was confined to  $1 \times 1 \text{ cm}^2$ . The voltage was applied from 0 to -1.2 V versus RHE. The scan rate was set as  $5 \text{ mV s}^{-1}$ . Cyclic voltammetry (CV) and linear sweep voltammetry (LSV) were performed to analyze the electrocatalytic activities of the as-obtained materials for CO<sub>2</sub>RR. The electrochemical impedance spectra (EIS) were carried out at open circuit potential with an amplitude of 10 mV in a frequency range from 1 MHz to  $10^{-2}$  Hz. The electrochemically active surface area (ECSA) was obtained through CV method. The specific capacitance was calculated by plotting the difference of the anodic and cathodic current densities at -0.1 V vs. RHE against the scan rate. Considering that flat sulfides electrode with  $1 \text{ cm}^2$  has a specific capacitance of about  $40 \text{ mF cm}^{-2}$ , this value was also used to calculate ECSA of MoS<sub>2</sub> and TiO<sub>2</sub>/MoS<sub>2</sub> electrodes through the following equation:

$$A_{ECSA} = \frac{\text{Specific capacitance}}{40 \mu\text{F cm}^{-2} \text{ cm}_{ECSA}^{-2}}$$

### Computation method

Density functional theory (DFT) calculations were performed using the Vienna ab initio simulation package (VASP).<sup>[1]</sup> Electron-ion interactions were described using standard projector-augmented wave (PAW) potentials.<sup>[2]</sup> The generalized gradient approximation (GGA) with the Perdew-Burke-Ernzerhof (PBE) functional were used to describe the electron-electron exchange and correlation functional.<sup>[3]</sup> A plane wave cutoff energy of 400 eV was applied in our calculations. The spin polarization was considered in all calculation. The vacuum layer is 15 Å. The Brillouin-zone integrations were performed using the only Gama point during the optimization. The iterative process considered was convergences, when the force on the atom was less than  $0.02 \text{ eV \AA}^{-1}$  and the energy change was less than  $10^{-5} \text{ eV}$  per atom. van der Waals (VDW) interactions were corrected using the D2 method of Grimme.<sup>[4]</sup>

The computational hydrogen electrode (CHE) approach was used to calculate the free energy of all intermediate species. The formula is defined as

$$\Delta G = \Delta E + \Delta ZPE - T \times \Delta S$$

Where  $\Delta E$  is the reaction energy calculated by the DFT method.  $\Delta ZPE$  and  $\Delta S$  are the changes in zero-point energies and entropy during the reaction, respectively.<sup>[5]</sup>

#### Reference

- [1] G. Kresse, J. Hafner, *Phys. Rev. B* **1994**, *49*, 14251–14269.
- [2] P. E. Blöchl, *Phys. Rev. B* **1994**, *50*, 17953–17979.
- [3] J. P. Perdew, K. Burke, M. Ernzerhof, *Phys. Rev. Lett.* 1996, *77*, 3865–3868.
- [4] S. Grimme, *J. Comput. Chem.* **2006**, *27*, 1787–1799.
- [5] J. K. Nørskov, T. Bligaard, A. Logadottir, J. R. Kitchin, J. G. Chen, S. Pandalov. U. Stimming, *J. Electrochem. Soc.* **2005**, *152*, J23–J26.

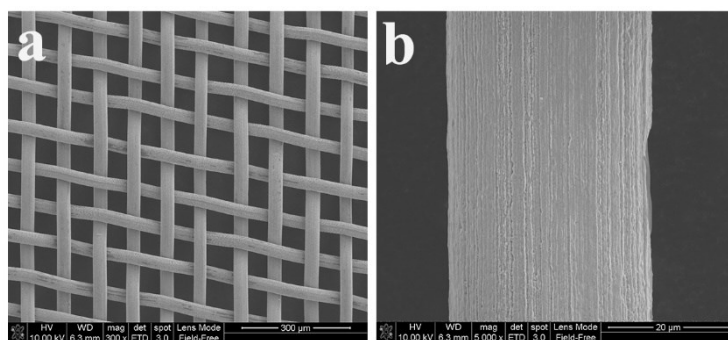

**Fig. S1** FESEM images of the used Mo mesh at different magnification.

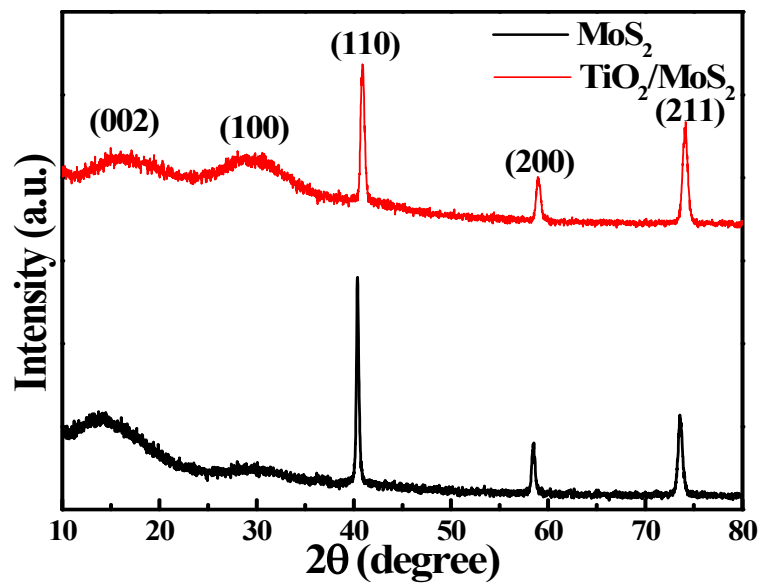

Fig. S2 XRD patterns of the as-synthesized  $\text{MoS}_2$  nanosheet arrays and  $\text{TiO}_2/\text{MoS}_2$ .

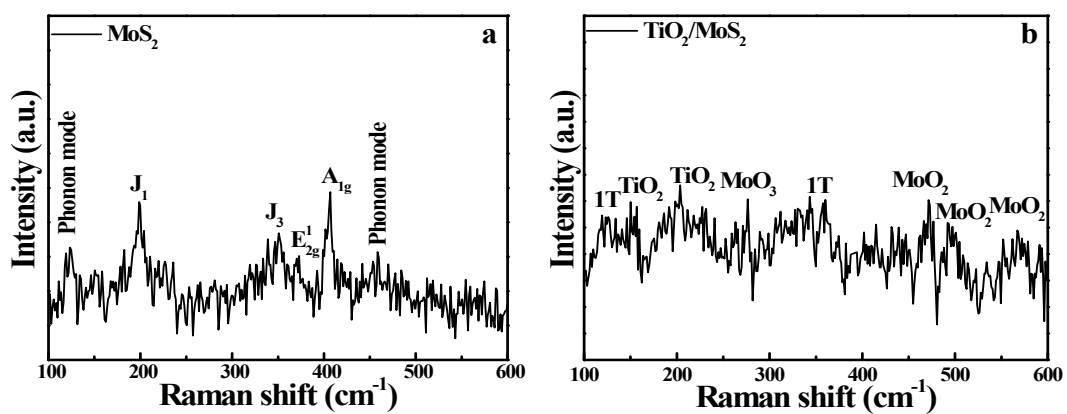

Fig. S3 Raman spectra of  $\text{MoS}_2$  (a) and  $\text{TiO}_2/\text{MoS}_2$  (b).

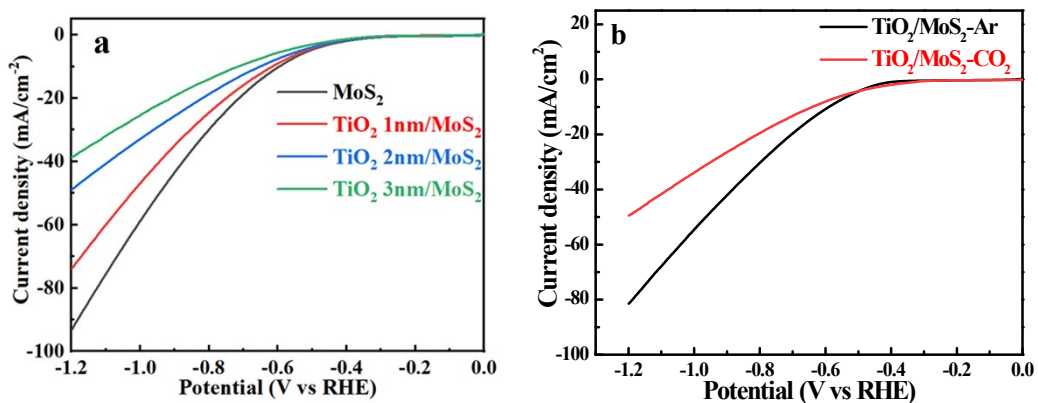

**Fig. S4** LSV curves obtained over TiO<sub>2</sub> with different thicknesses/MoS<sub>2</sub> in CO<sub>2</sub>-saturated 0.5 M KHCO<sub>3</sub> aqueous solution (a). LSV curves of 2 nm TiO<sub>2</sub>/MoS<sub>2</sub> in Ar- and CO<sub>2</sub>-saturated 0.5 M KHCO<sub>3</sub> aqueous solution (b).

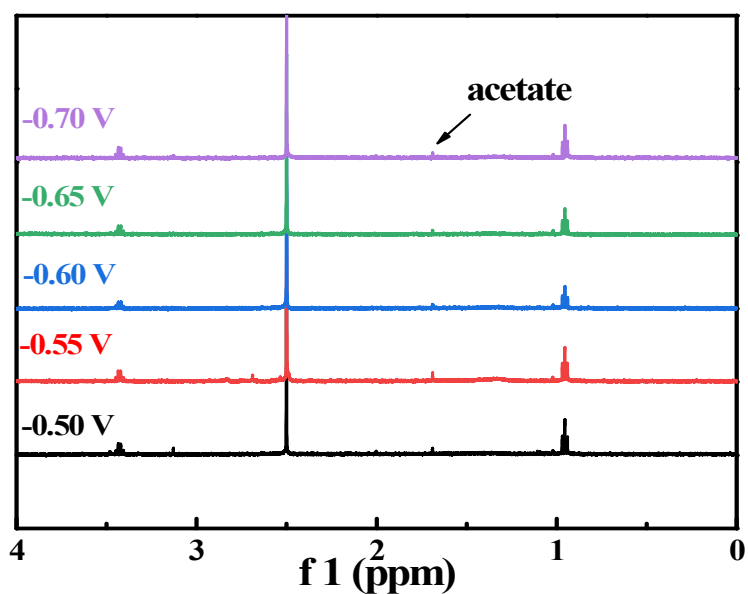

**Fig. S5** <sup>1</sup>H NMR spectra of liquid products obtained through CO<sub>2</sub> electrolysis over TiO<sub>2</sub>/MoS<sub>2</sub> nanosheet arrays.

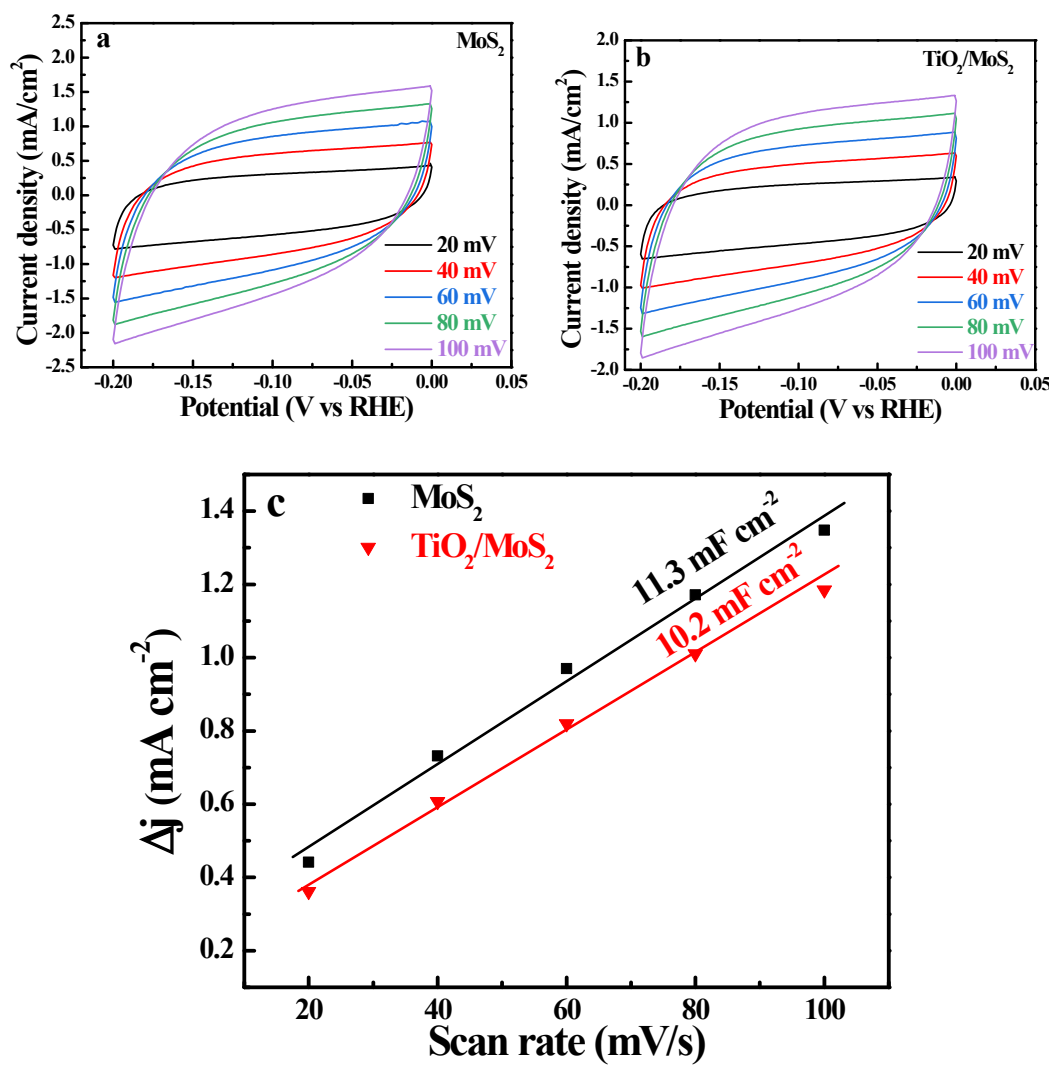

**Fig. S6** CV curves of MoS<sub>2</sub> (a) and TiO<sub>2</sub>/MoS<sub>2</sub> (b) performed at different scan rates. Charging current density differences plotted against scan rates (c).

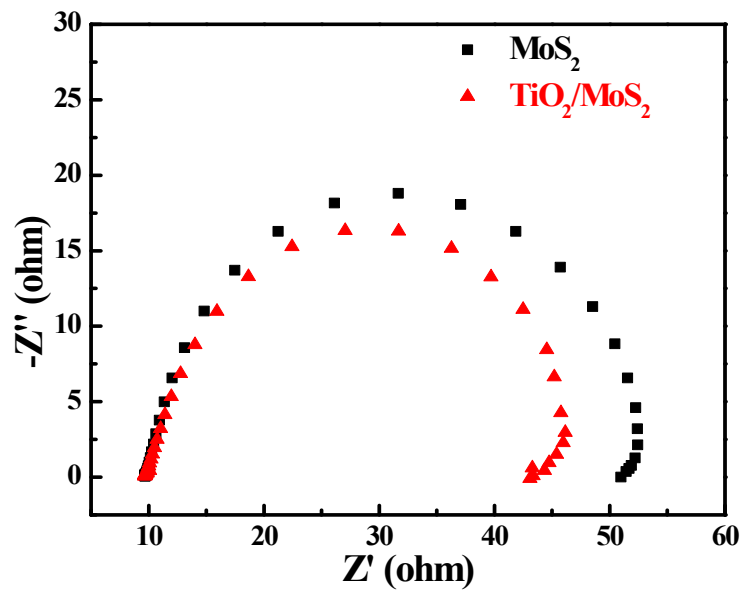

Fig. S7 EIS spectra of MoS<sub>2</sub> and TiO<sub>2</sub>/MoS<sub>2</sub>.

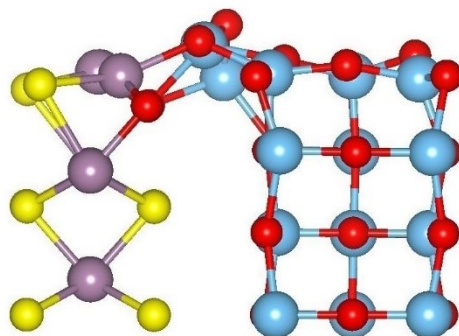

Fig. S8 Stable interfacial structure model of TiO<sub>2</sub>/MoS<sub>2</sub>.



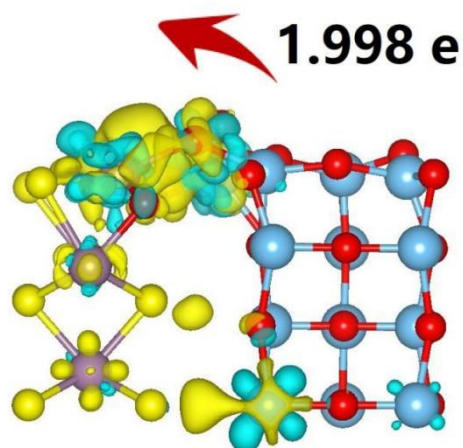

**Fig. S9** Charge density difference and net Bader charge transfer of  $\text{TiO}_2/\text{MoS}_2$ .

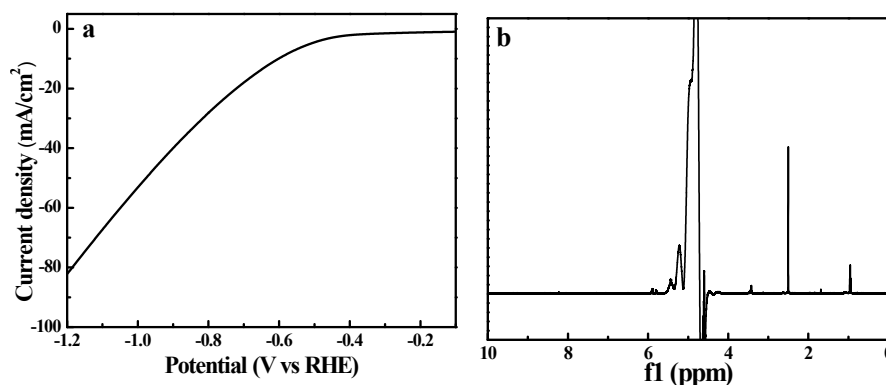

**Fig. S10** LSV curve of  $\text{TiO}_2/\text{MoS}_2$  in CO-saturated 0.5 M  $\text{KHCO}_3$  aqueous solution (a). Corresponding  $^1\text{H}$  NMR spectrum of liquid products (b).

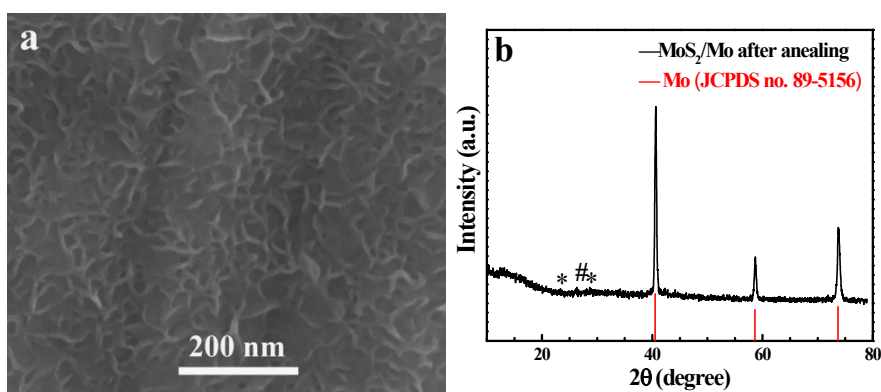

**Fig. S11** FESEM image (a) and XRD pattern (b) of MoS<sub>2</sub> nanosheet arrays grown on Mo mesh after annealing in air at 300 °C for 4 h. \* and # denote MoO<sub>3</sub> and MoO<sub>2</sub>, respectively.

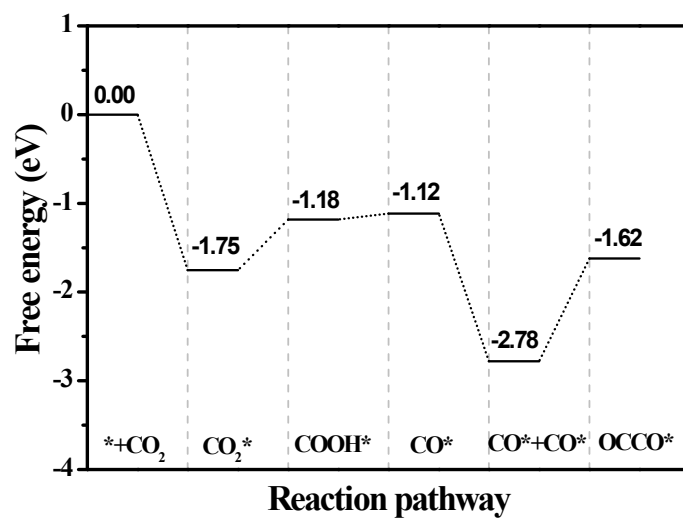

**Fig. S12** Free energy diagrams for the coupling reaction of CO over MoS<sub>2</sub>.

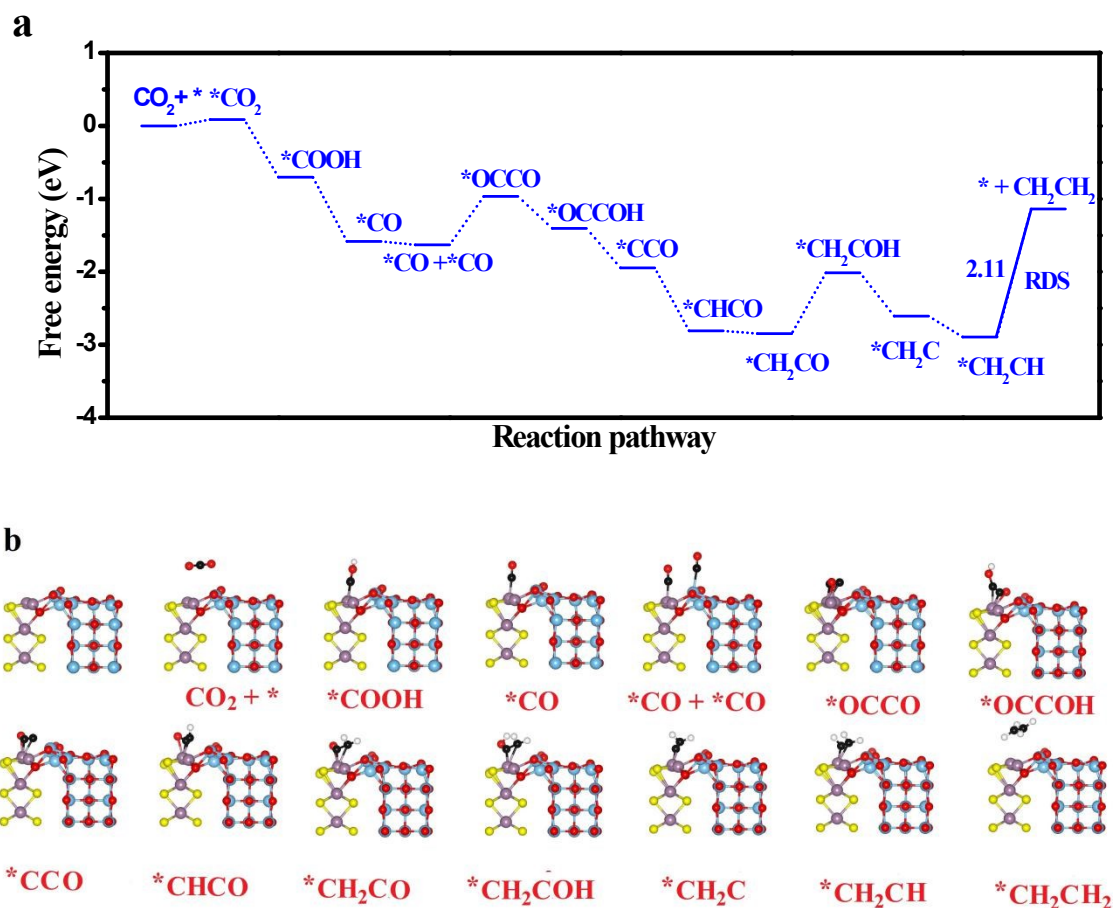

**Fig. 13** Free energy diagrams for  $\text{CO}_2\text{RR}$  over  $\text{TiO}_2/\text{MoS}_2$  toward ethylene (a). The optimized geometries for the reaction intermediates during the  $\text{CO}_2\text{RR}$  process to  $\text{C}_2\text{H}_4$  over the interface of  $\text{TiO}_2/\text{MoS}_2$  (b).

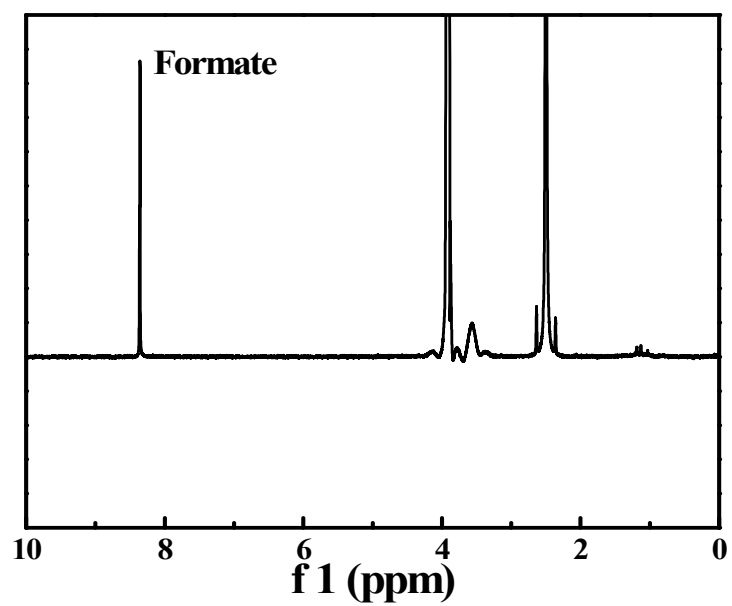

**Fig. S14**  $^1\text{H}$  NMR spectrum of liquid products obtained through  $\text{CO}_2$  electrolysis over  $\text{MoS}_2$  nanosheet arrays loaded by excess  $\text{TiO}_2$ .

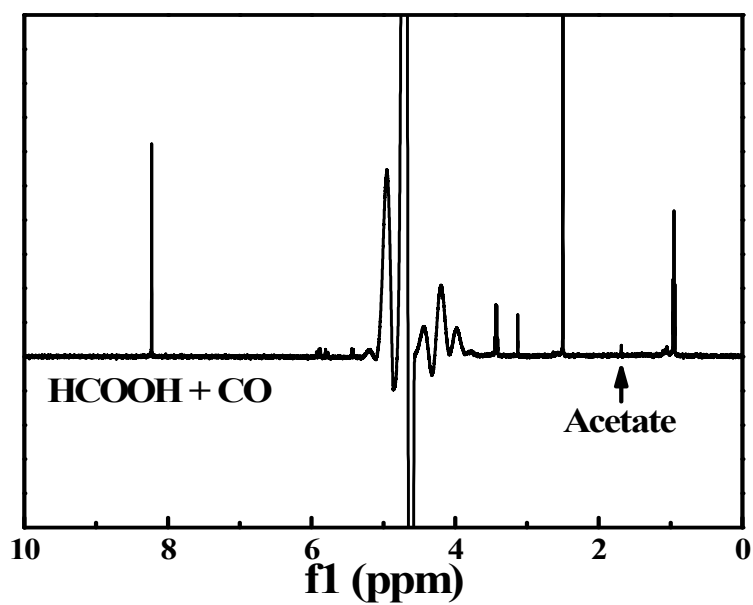

**Fig. S15**  $^1\text{H}$  NMR spectrum of liquid products obtained through  $\text{CO}$  electrolysis over  $\text{TiO}_2/\text{MoS}_2$  nanosheet arrays in the presence of formate ions.

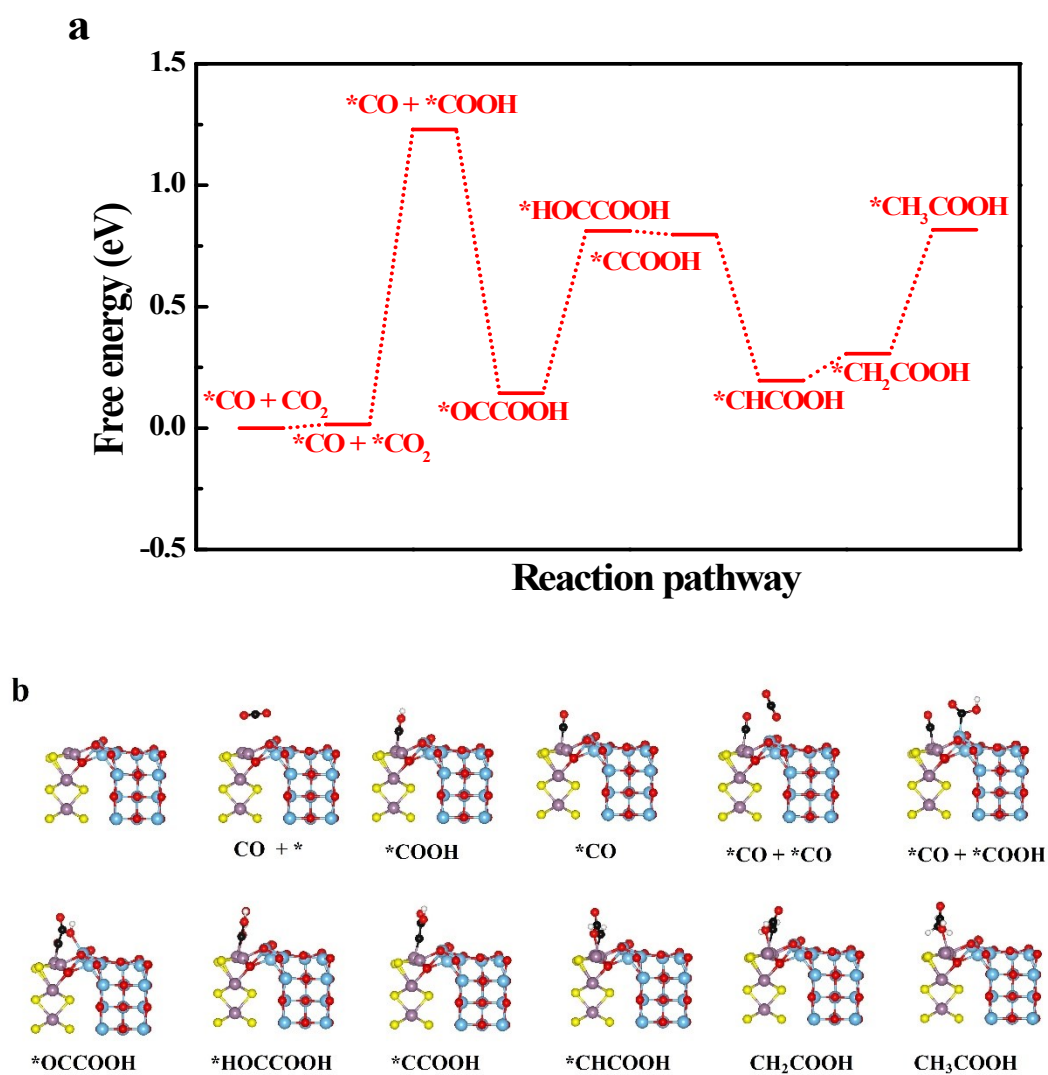

**Fig. S16** Free energy diagrams for CO<sub>2</sub>RR over TiO<sub>2</sub>/MoS<sub>2</sub> toward acetate (a). The optimized geometries for the reaction intermediates during the CO<sub>2</sub>RR process to CH<sub>3</sub>COOH over the interface of TiO<sub>2</sub>/MoS<sub>2</sub> (b).

**Table S1.** Comparison of electrocatalytic activity of different electrocatalysts for CO<sub>2</sub>RR toward ethanol.

| Catalysts                          | Reaction condition                           | FE (%) | Partial current density [mA cm <sup>-2</sup> ] | Reference |
|------------------------------------|----------------------------------------------|--------|------------------------------------------------|-----------|
| Cu nanoparticle ensembles          | 0.1 M KHCO <sub>3</sub> ,<br>-0.86 V vs RHE  | 16.6   | 3.4                                            | 1         |
| B doped Cu                         | 0.1 M KCl<br>-1.1 V vs RHE                   | 27     | 18.9                                           | 2         |
| Cu <sub>4</sub> Zn                 | 0.1 M KHCO <sub>3</sub><br>-1.05 V vs RHE    | 29.1   | 8.2                                            | 3         |
| Cu-Au alloy                        | 0.5 M KHCO <sub>3</sub><br>-1.1 V vs SCE     | 12     | 0.24                                           | 4         |
| Phase-blended Ag-Cu <sub>2</sub> O | 0.2 M KCl<br>-1.2V vs RHE                    | 34.2   | 0.9                                            | 5         |
| Cu/TiO <sub>2</sub>                | 0.2 M KI<br>-1.45 V vs. RHE                  | 27.4   | 8.7                                            | 6         |
| Cu <sub>2</sub> S-Cu-V             | 0.1 M KHCO <sub>3</sub><br>-0.95 V vs RHE    | 15.1   | 4.8                                            | 7         |
| Cu-C <sub>3</sub> N <sub>4</sub>   | 0.1 M KHCO <sub>3</sub><br>-1.6 V vs Ag/AgCl | 10     | 0.8                                            | 8         |
| Nitrogen-doped mesoporous carbon   | 0.1 M KHCO <sub>3</sub><br>-0.56 V vs RHE    | 77     | 0.5                                            | 9         |
| B and N-co-doped nanodiamond       | 0.1 M NaHCO <sub>3</sub><br>-1.0 V vs RHE    | 93.2   | 0.6                                            | 10        |
| TiO <sub>2</sub> /MoS <sub>2</sub> | 0.5 M KHCO <sub>3</sub><br>-0.6 V vs RHE     | 50     | 1.2                                            | This work |

## Reference

- [1] D. Kim, C. S. Kley, Y. Li, P. Yang, *Proc. Natl. Acad. Sci.* **2017**, *114*, 10560–10565.
- [2] Y. S. Zhou, F. L. Che, M. Liu, C. Q. Zou, Z. Q. Liang, P. D. Luna, H. F. Yuan, J. Li, Z. Q. Wang, H. P. Xie, H. M. Li, P. N. Chen, E. Bladt, R. Quintero-Bermudez, T. K. Sham, S. Bals, J. Hofkens, D. Sinton, G. Chen, *Nat. Chem.* **2018**, *10*, 974–980.
- [3] D. Ren, B. S. H. Ang, B. S. Yeo, *ACS Catal.* **2016**, *6*, 8239–8247.
- [4] F. L. Jia, X. X. Yu, L. Z. Zhang, *J. Power Sources* **2014**, *252*, 85–89.
- [5] S. Lee, G. Park, J. Lee, *ACS Catal.* **2017**, *7*, 8594–8604.
- [6] J. Yuan, L. Liu, R. R. Guo, S. Zeng, H. Wang, J. X. Lu, *Catalysts* **2017**, *7*, 220.
- [7] T. T. Zhuang, Z. Q. Liang, A. Seifitokaldani, Y. Li, P. D. Luna, T. Burdyny, F. L. Che, F. Meng, Y. M. Min, R. Quintero-Bermudez, C. T. Dinh, Y. J. Pang, M. Zhong, B. Zhang, J. Li, P. N. Chen, X. L. Zheng, H. Y. Liang, W. N. Ge, B. J. Ye, D. Sinton, S. H. Yu, E.H. Sargent, *Nat. Catal.* **2018**, *1*, 421–428.
- [8] Y. Jiao, Y. Zheng, P. Chen, M. Jaroniec, S. Z. Qiao, *J. Am. Chem. Soc.* **2017**, *139*, 18093–18100.
- [9] Y. F. Song, W. Chen, C. C. Zhao, S. G. Li, W. Wei, Y. H. Sun, *Angew. Chem. Int. Ed.* **2017**, *56*, 10840–10844.
- [10] Y. M. Liu, Y. J. Zhang, K. Cheng, X. Quan, X. F. Fan, Y. Su, S. Chen, H. M. Zhao, Y. B. Zhang, H. T. Yu, M. R. Hoffmann, *Angew. Chem. Int. Ed.* **2017**, *56*, 15607–15611.
